# Supplementary material
Source: publisher site journal article supplement (https://www.spandidos-publications.com/2014/downloadSupplementary)

Figure S1. Expression of miR-3690 in human TC SW1736 cell line and miR-3690 regulated TC cell proliferation. (A) Validation of miR-3690 expression levels following transfection by PCR analysis. (B) MTT assays revealed that overexpression of miR-3690 promoted proliferation of SW1736 cells while miR-3690-in suppressed proliferation of SW1736 cells. (C) miR-3690 promoted, while inhibition of miR-3690 inhibited the anchorage-independent growth of SW1736 cells. \* $P < 0.05$  vs. NC group or vector group. miR, microRNA; TC, thyroid cancer.

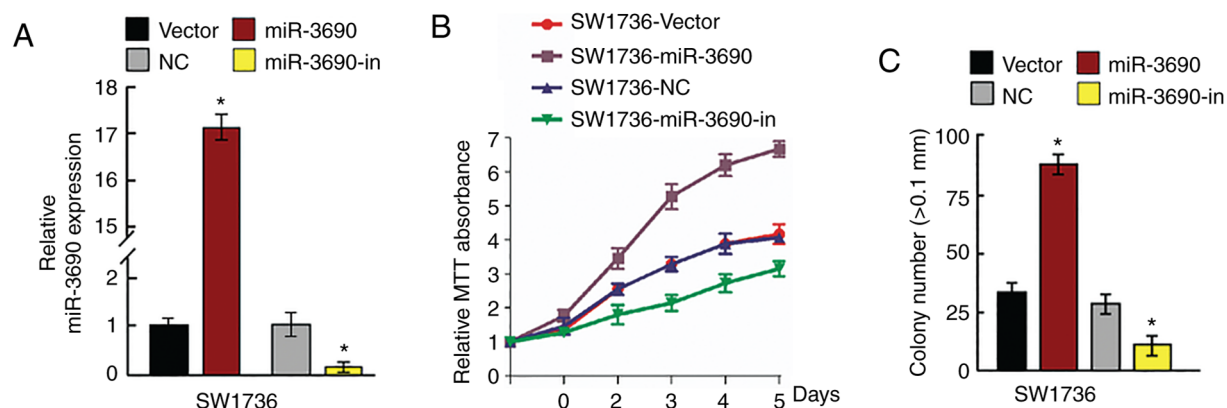

Supplement: Supplementary file 1 [file downloadSupplementary]
